# Supplementary material
Source: MDPI journal article supplement (https://www.mdpi.com/2076-3263/10/4/126)
Supplement: s1 [file s1]

Article

# The avalanche of Les Fonts d'Arinsal (Andorra): An Example of a Pure Powder, Dry Snow Avalanche

Supplementary Materials

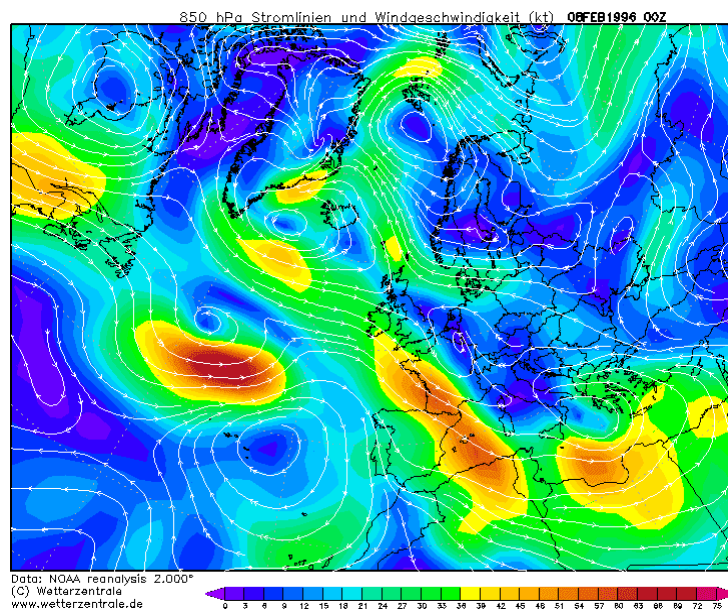

**Figure S1.** Streamlines and wind intensity (kt) at 850 hPa (around 1500 m) from February 8<sup>th</sup> at 00h UTC from NOAA Reanalysis. Source: [www.wetterzentrale.com](http://www.wetterzentrale.com).

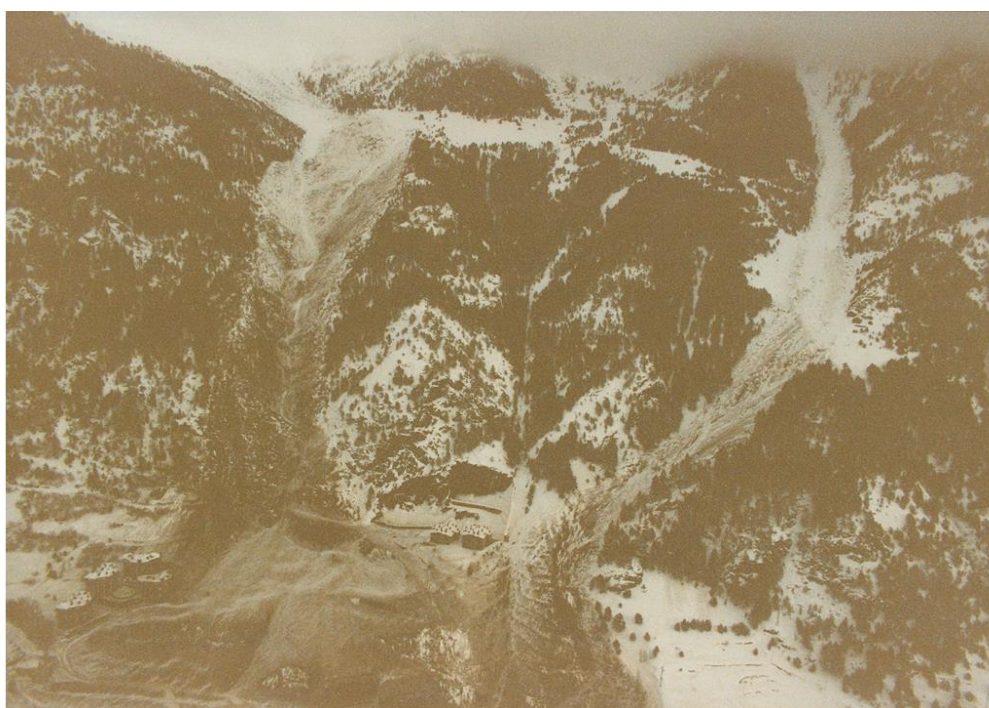

**Figure S2.** Helicopter view of the track and part of the run-out zones of the Les Fonts d'Arinsal and Percanela avalanches.

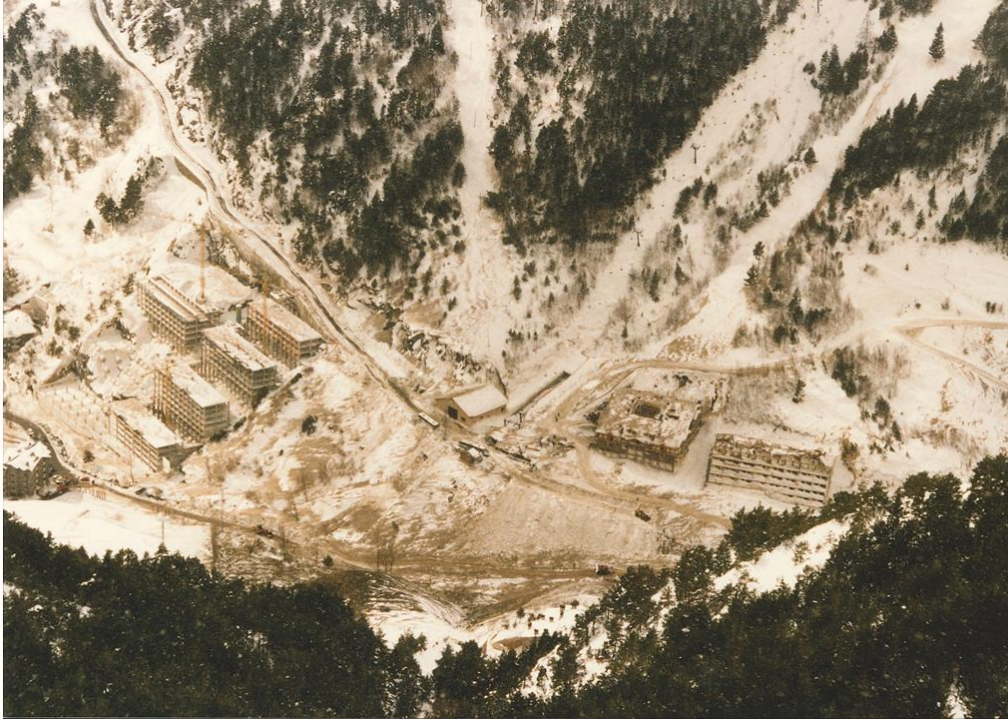

**Figure S3.** Helicopter view of the Les Fonts d'Arinsal avalanche run-out zone taken from above the track zone.

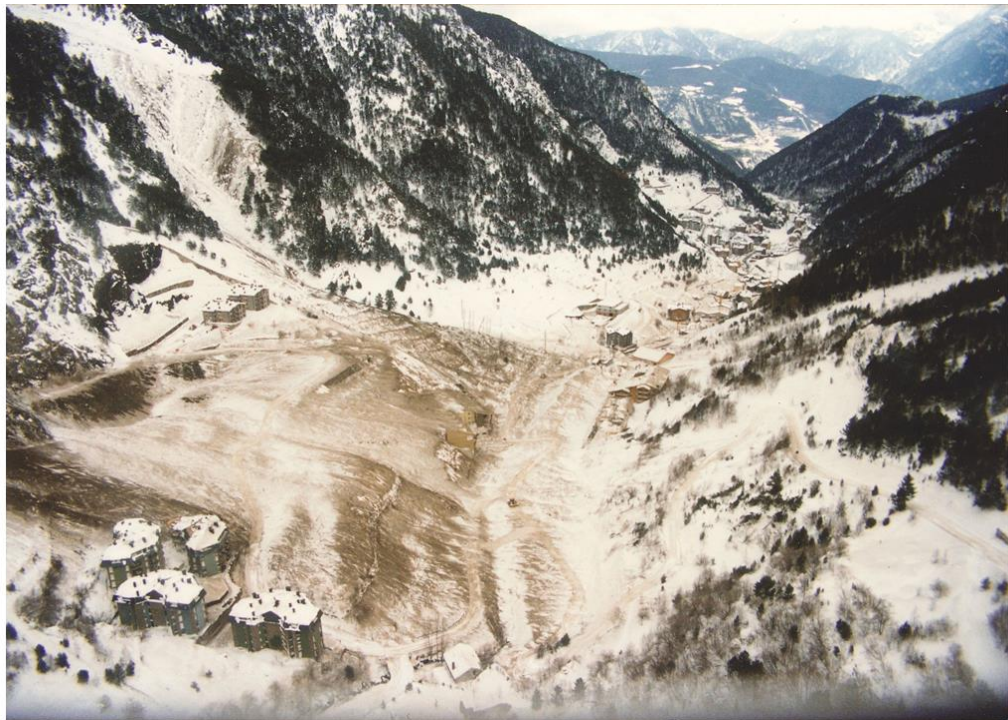

**Figure S4.** Helicopter view of the Les Fonts d'Arinsal avalanche run-out zone. Downstream Arinsal valley perspective.

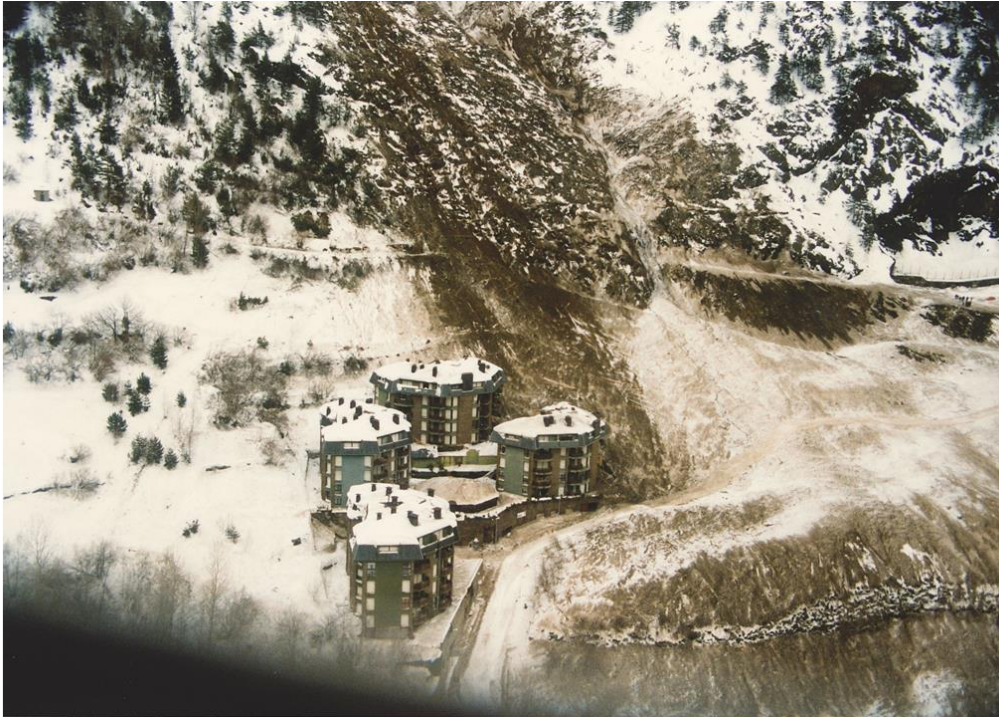

**Figure S5.** Helicopter view of the Les Fonts d'Arinsal avalanche run-out zone. Detail of Prat Sobirans buildings.

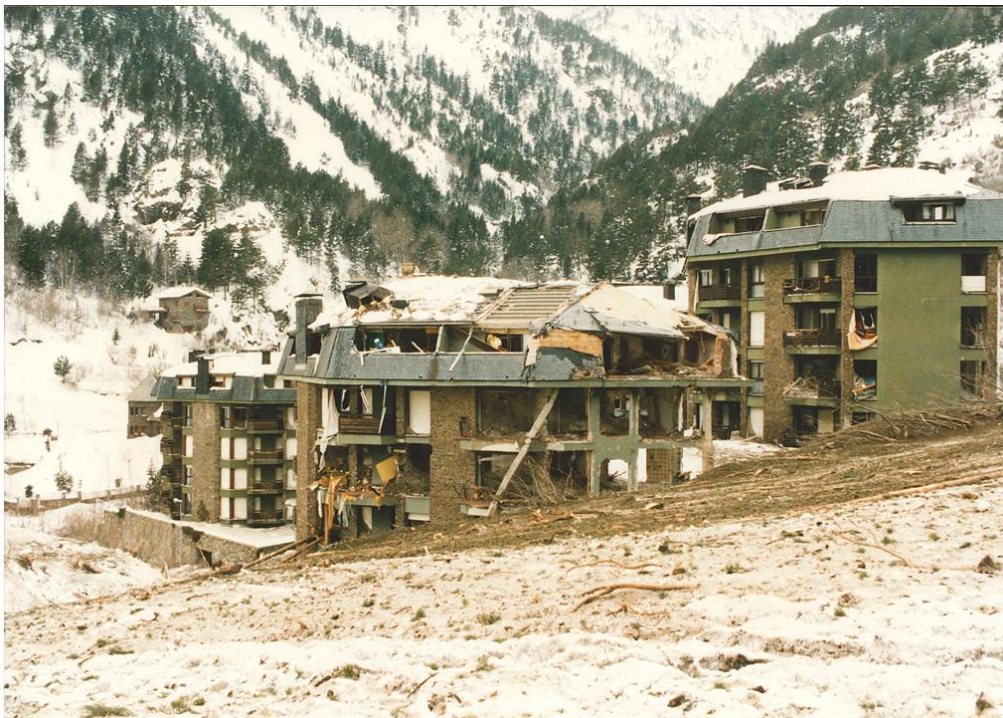

**Figure S6.** Helicopter view of the Les Fonts d'Arinsal avalanche run-out zone. Closer detail of Prat Sobirans buildings.

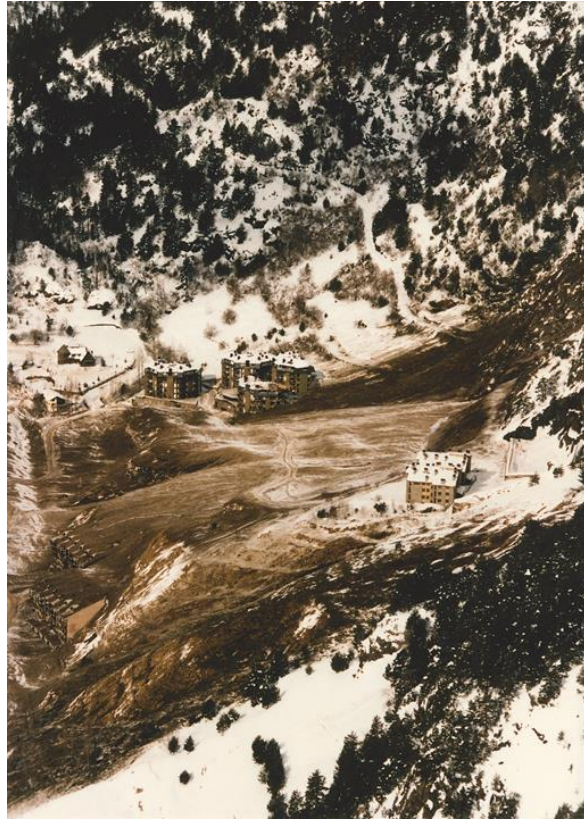

**Figure S7.** Helicopter view of the Les Fonts d'Arinsal avalanche run-out zone. Upstream Arinsal valley perspective.

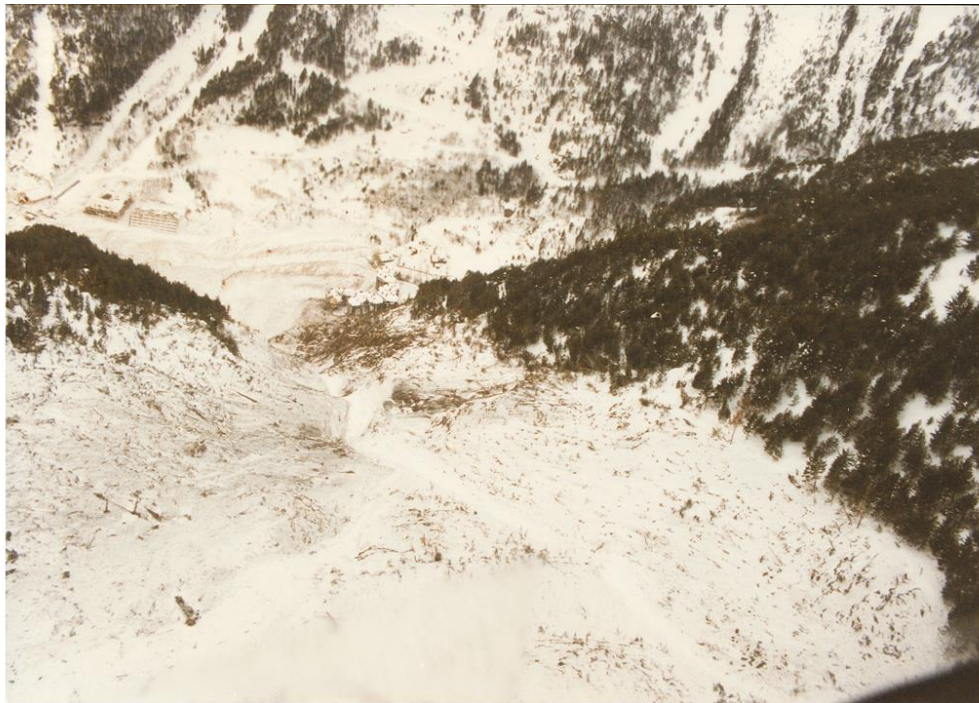

**Figure S8.** Helicopter view of the Les Fonts d'Arinsal avalanche track zone. Downstream perspective.

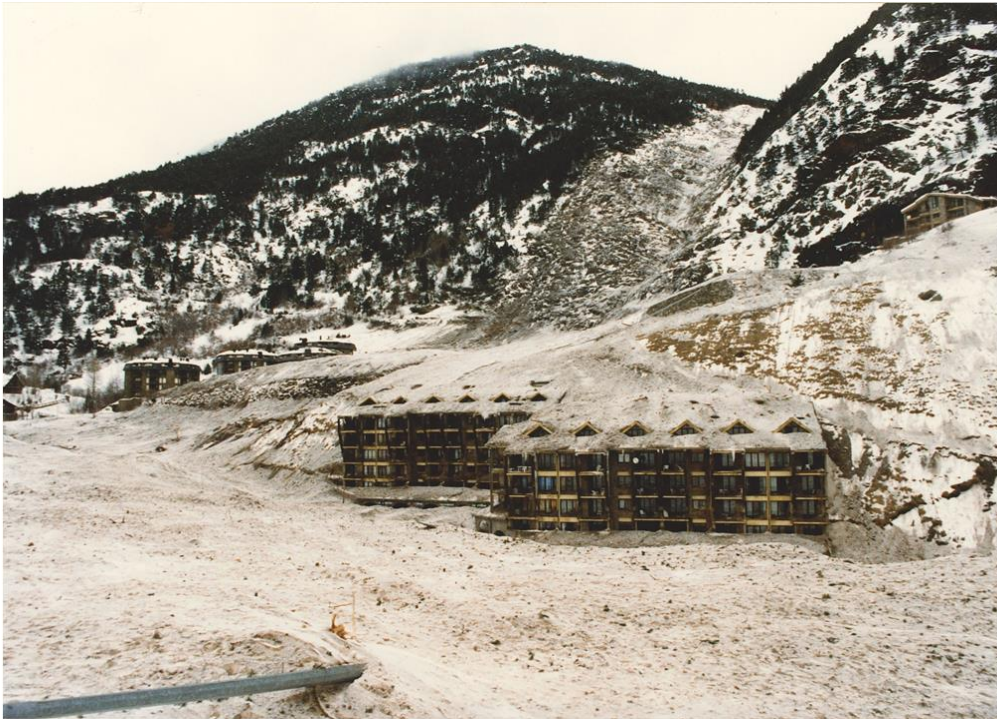

**Figure S9.** Helicopter view of the Les Fonts d'Arinsal avalanche run-out zone. Detail of Amadeus buildings. Track zone in the background.

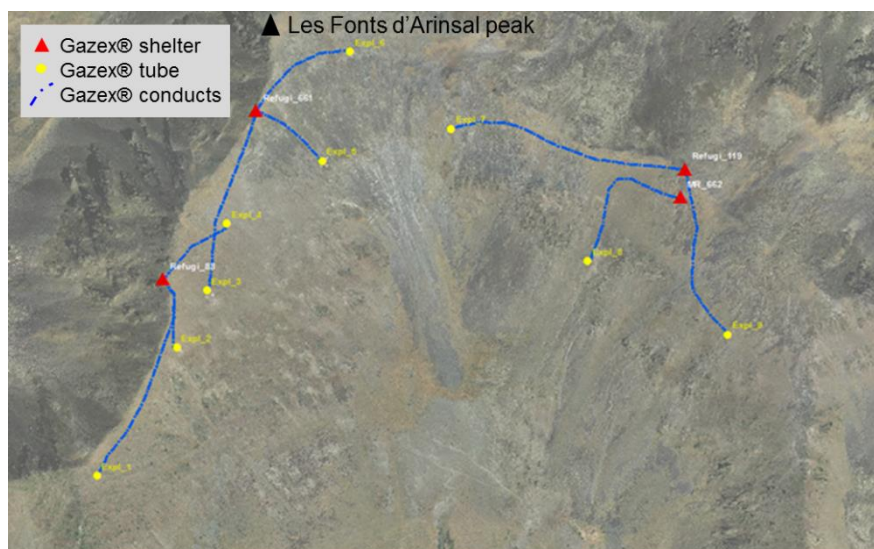

**Figure S10.** Gazex® system in the release zone of Les Fonts d'Arinsal avalanche path.

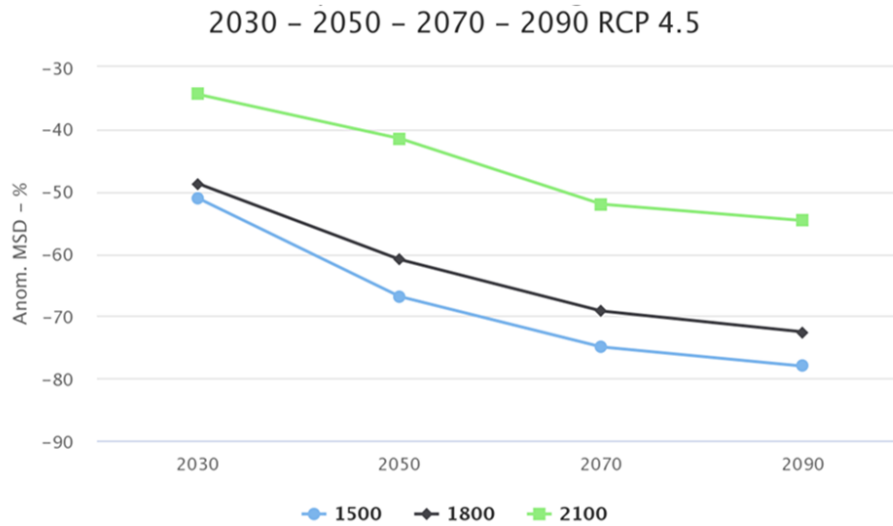

**Figure S11.** Anomaly respect to the reference period 1986–2005 of mean snow depth during the winter season for scenario RCP 4.5 (scenario including climate policies aiming to stabilize CO<sub>2</sub> concentrations) at near, mid-term and long-term horizon and different altitudes (1500, 1800, 2100 m). Results correspond to the median of the complete set of models of the ADAMONT2017 experiment (Verfaillie et al., 2017; <https://opcc-ctp.org/fr/geoportal>).

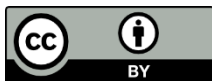

© 2020 by the authors. Submitted for possible open access publication under the terms and conditions of the Creative Commons Attribution (CC BY) license (<http://creativecommons.org/licenses/by/4.0/>).
